# Supplementary material for: Effect of Posttranslational Modifications on the Structure and Activity of FTO Demethylase
Source: MDPI journal article supplement (doi:10.3390/ijms22094512), 2021-04-26
Supplement: s1 [file s1]

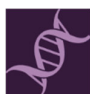

## Supplementary Material

### Effect of posttranslational modifications on the structure and activity of FTO demethylase.

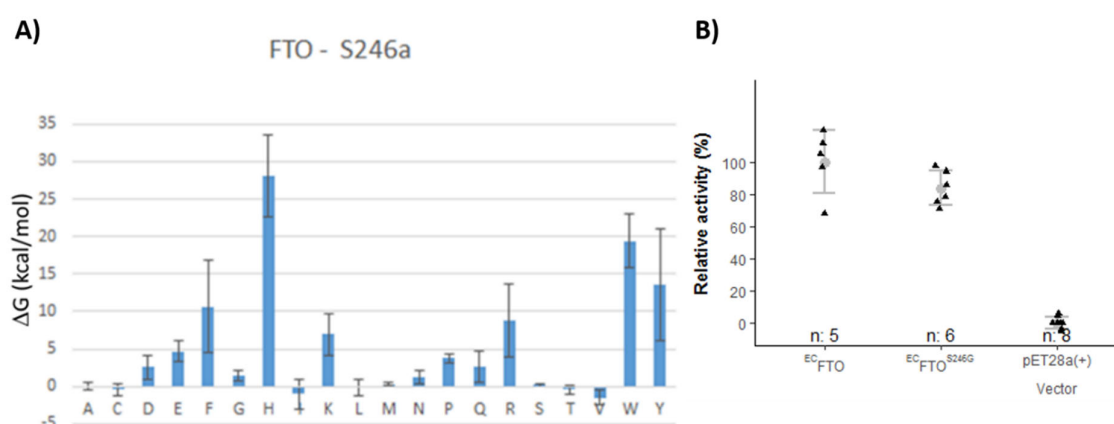

**Supplementary Figure 1.** *In silico* and *in vitro* S246G substitution effect on FTO parameters. **(A)** Prediction of the impact of various S246 amino acid substitutions on FTO protein stability. The effect of the S246G substitution was estimated at 0.5 kcal/mol, which is little in comparison to other substitutions. **(B)** Enzymatic activity of  $^{EC}FTO^{S246G}$  mutant based on chemiluminescence assay.  $N^6$ -meA was used as a substrate. Relative activity is referenced to the activity of 1  $\mu$ g of  $^{EC}FTO$  (100%). Data are represented as points and means, with whiskers showing sample standard deviation. n – number of samples.

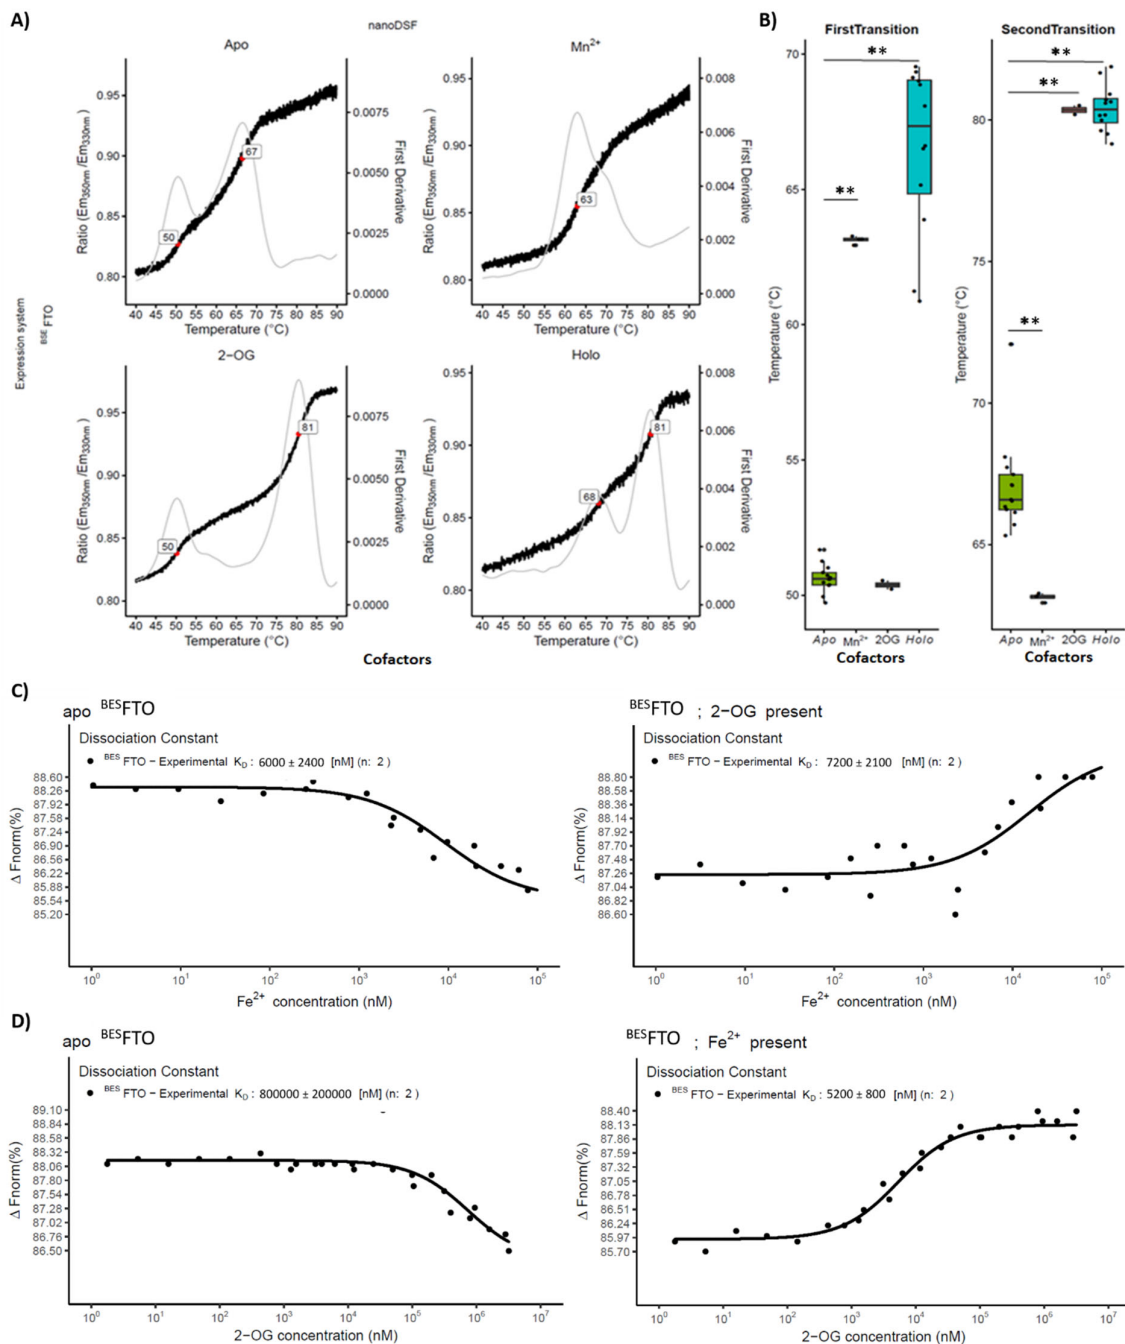

**Supplementary Figure 2. Effect of cofactors on  $BESFTO$  parameters (A,B).** NanoDSF analysis of the  $BESFTO$  thermal stability in the absence (apo) or presence of  $Mn^{2+}$ , 2-OG, or both cofactors (holo). A) Ratio of emissions (bold lines) and first derivative (thin lines) curves are shown as a function of temperature. Under all conditions, except the  $Mn^{2+}$  alone, two unfolding transitions (red dots) occurs: the first one ( $T_{m1}$ ) less prominent, at a lower temperature, and the second one ( $T_{m2}$ ) more clear, at a higher temperature. The first transition is affected by  $Mn^{2+}$ , while the second one changes in the presence of 2-OG. (B) Comparison of  $BESFTO$  melting temperatures under different experimental conditions. Gathered data are represented as a boxplots. Box represents the interquartile range. Whiskers show the highest and the lowest data points. Horizontal line within a box represents median value. n – number of samples. \*\*  $P < 0.05$ . (C,D) MST analysis of  $BESFTO$  interaction with  $Fe^{2+}$  (C) and 2-OG (D). The plot represents dose response curves (changes of the initial fluorescence during thermophoresis) of labeled

<sup>BES</sup>FTO in the presence of the increasing concentrations of the one ligand in the presence (right) or absence (left) of the second. Under both conditions <sup>BES</sup>FTO interacts with Fe<sup>2+</sup>, with similar K<sub>D</sub>. The <sup>BES</sup>FTO-2-OG complex in the Fe<sup>2+</sup> absence showed ~150 times higher K<sub>D</sub> than in Fe<sup>2+</sup> presence indicating that Fe<sup>2+</sup> presence was crucial for <sup>BES</sup>FTO-2-OG interaction. K<sub>D</sub> are presented as estimated value ± standard deviation. n –number of repetitions.

| Amino acid | Position | <sup>EC</sup> FTO                                |                                         | <sup>BES</sup> FTO                               |                                         |
|------------|----------|--------------------------------------------------|-----------------------------------------|--------------------------------------------------|-----------------------------------------|
|            |          | Amount of peptides carrying modification (score) | Amount of peptides without modification | Amount of peptides carrying modification (score) | Amount of peptides without modification |
| T          | 6        | 1                                                | 3                                       | 3                                                | 26                                      |
| T          | 32       | 0                                                | 29                                      | 2                                                | 125                                     |
| Y          | 39       | 0                                                | 32                                      | 1                                                | 188                                     |
| S          | 55       | 0                                                | 56                                      | 3                                                | 541                                     |
| S          | 56       | 1                                                | 55                                      | 5                                                | 525                                     |
| T          | 105      | 0                                                | 35                                      | 1                                                | 196                                     |
| Y          | 106      | 1                                                | 34                                      | 0                                                | 197                                     |
| Y          | 108      | 0                                                | 1                                       | 1                                                | 135                                     |
| T          | 111      | 0                                                | 1                                       | 1                                                | 35                                      |
| T          | 138      | 2                                                | 104                                     | 0                                                | 57                                      |
| S          | 173      | 0                                                | 43                                      | 1                                                | 169                                     |
| S          | 183      | 0                                                | 99                                      | 8                                                | 657                                     |
| S          | 184      | 0                                                | 99                                      | <b>23</b>                                        | <b>643</b>                              |
| Y          | 185      | 0                                                | 99                                      | 6                                                | 661                                     |
| S          | 195      | 0                                                | 0                                       | 1                                                | 814                                     |
| Y          | 214      | 0                                                | 3                                       | 2                                                | 201                                     |
| S          | 229      | 1                                                | 196                                     | 2                                                | 331                                     |
| S          | 256      | 0                                                | 1                                       | <b>49</b>                                        | <b>81</b>                               |
| S          | 260      | 0                                                | 1                                       | <b>30</b>                                        | <b>123</b>                              |
| S          | 313      | 0                                                | 39                                      | 8                                                | 79                                      |
| S          | 318      | 0                                                | 3                                       | 1                                                | 112                                     |
| S          | 319      | 0                                                | 3                                       | 1                                                | 109                                     |
| T          | 320      | 0                                                | 3                                       | 1                                                | 109                                     |
| S          | 327      | 0                                                | 75                                      | 1                                                | 166                                     |
| S          | 355      | 0                                                | 65                                      | 8                                                | 105                                     |
| S          | 358      | 0                                                | 15                                      | 2                                                | 81                                      |
| T          | 393      | 0                                                | 10                                      | 1                                                | 62                                      |
| S          | 458      | 0                                                | 0                                       | 4                                                | 51                                      |
| S          | 482      | 0                                                | 27                                      | 1                                                | 198                                     |
| S          | 494      | 0                                                | 27                                      | 1                                                | 314                                     |

**Supplementary Figure 3. MS analysis of putative phosphorylation sites in <sup>EC</sup>FTO and <sup>BES</sup>FTO.** Tables show the amount of specific peptides carrying a modified residue in comparison to unmodified ones. Phosphorylations significantly exceeded the set threshold (>20 detected peptides with modification) are present only in <sup>BES</sup>FTO (in bold).

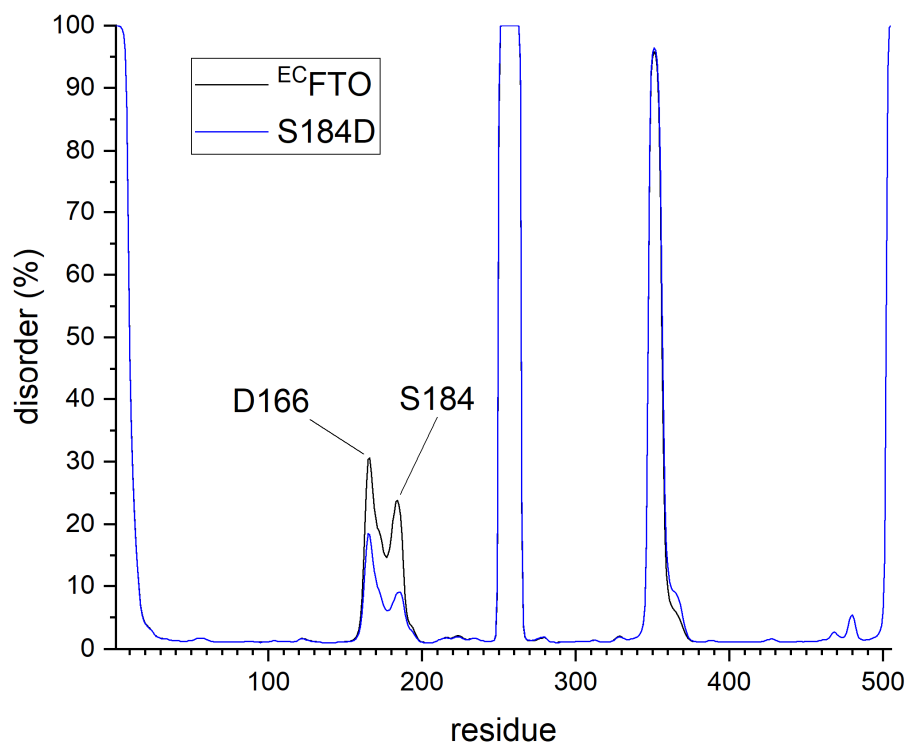

**Supplementary Figure 4. Effect of S184D substitution on FTO stability.** Profile of the protein disorder was estimated for unmodified FTO and S184D variant with RaporX server. The partially disordered loop (N164-G187), which is invisible in the PDB structures, is significantly stabilized by S184D replacement.

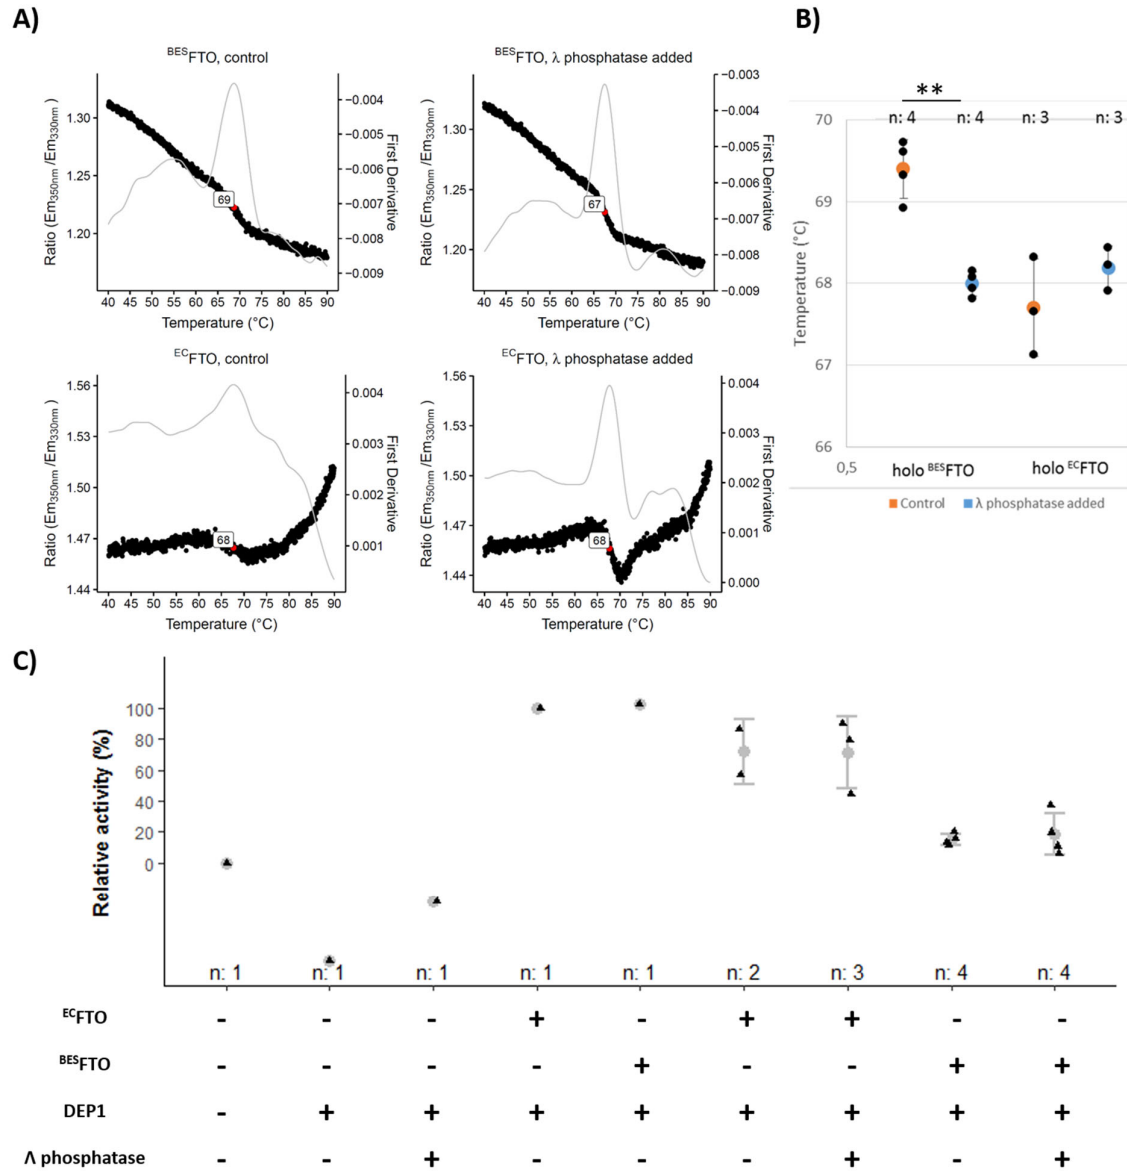

**Supplementary Figure 5. Dephosphorylation effect on FTO parameters.** A,B) NanoDSF analysis of the dephosphorylation effect on the thermal stability of purified  $^{EC}FTO$  and  $^{BES}FTO$  in the presence of  $Mn^{2+}$  and 2-OG (holo). Unfolding temperatures of all preparations were determined in the presence of the  $Mn^{2+}$  and 2-OG after  $\lambda$  phosphatase treatment (blue) or through control experiment without enzyme (orange). For  $^{BES}FTO$ ,  $\lambda$  phosphatase significantly decreases the  $T_m$ . A) Plots illustrate ratio of emissions (bold lines) and first derivative (thin lines) curves as a function of temperature. All four protein preparations display one distinct unfolding transition (red dots). B) Gathered data are represented as points and means, with whiskers showing sample standard deviation. n – number of samples. \*\*  $P < 0.05$ . C) Effect of dephosphorylation procedure on  $^{EC}FTO$  and  $^{BES}FTO$  enzymatic activity.  $N^6$ -meA was used as substrate. Relative activity is referenced to activity of  $1 \mu g$   $^{EC}FTO$  (100%). Data are represented as points and a means with whiskers showing standard deviation. n – number of independent experiments.

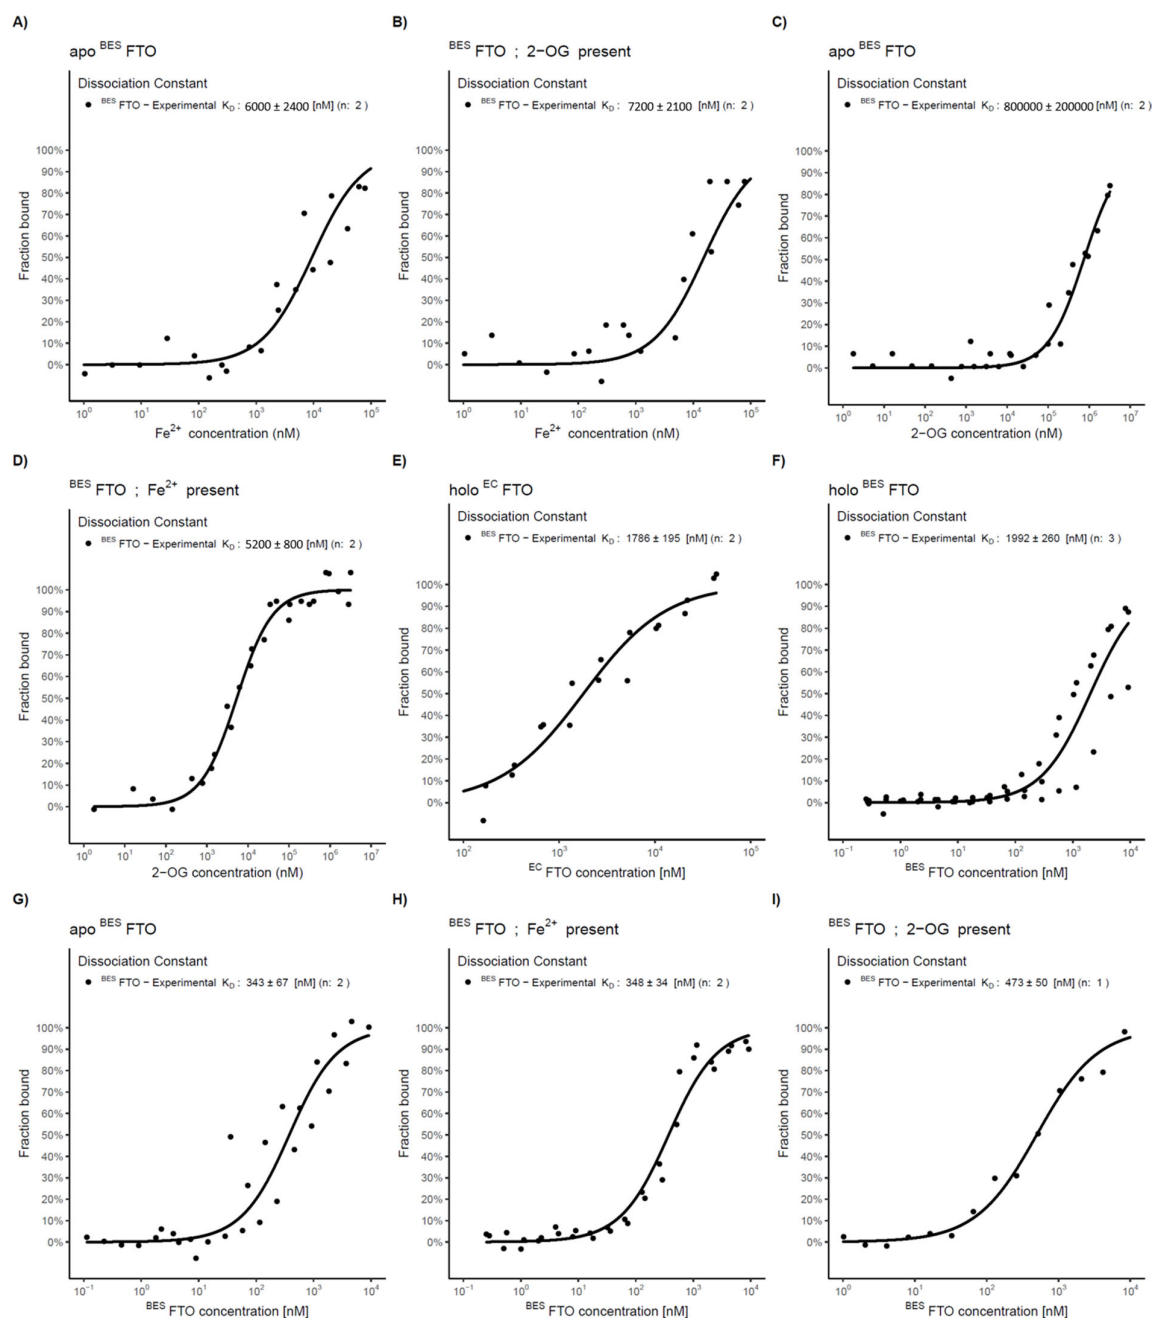

**Supplementary Figure 6. Comparison of the MST experiments.** (A-I). The plot represents complex level of labeled protein at a given FTO concentration for each separate sample (data points) and for modeled equilibrium between protein alone and the complex (straight lines).  $K_D$  are shown as estimated value ± standard deviation.  $n$  – number of repetitions.

**Supplementary Table 1. PCR primers**

|                         |                                                |
|-------------------------|------------------------------------------------|
| FTO S246G (forward)     | 5'- CCGTGGCAGTGTAC <u>G</u> TTATAGCTGTGAAG-3'  |
| FTO S246G (reverse)     | 5'- CTTCACAGCTATAAC <u>C</u> GTACACTGCCACCG-3' |
| FTO S256D (forward)     | 5'- GCCCTGAAGAGGAA <u>G</u> ATGAGGATGACTCTC-3' |
| FTO S256D (reverse)     | 5'- GAGAGTCATCCTCA <u>T</u> CTTCCTCTCAGGGC -3' |
| FTO construct (forward) | 5'-AGCGGCTCTTCAATGAAGCGCACCCCGACTGCC-3'        |
| FTO construct (reverse) | 5'-AGCGGCTCTTCTCCCGGGTTTGTCTCCAGAAGCT-3'       |

*Amino acid sequences of recombinant FTO proteins. Amino acid sequence of His-Tag is underlined*

<sup>EC</sup>**FTO:**

MGSSHHHHHHSSGLVPRGSHMKRTPTAEEREREAKKLRLLEELEDTWLPYLTPKDDEFYQQ  
WQLKYPKLILREASSVSEELHKEVQEAFLLHKGCLFRDLVRIQGKDLLTPVSRILIGNPGCT  
YKYLNTRLFTVPWPVKGSNIKHTAEIAAACETFLKLNDYLIQETIQALEELAAKEKANEDAV  
PLCMSADFPRVGMGSSYNGQDEVDIKSRAAYNVTLNFMDPQKMPYLKEEYPFGMGKMAV  
SWHHDENLVDRSAVAVYSYCEGPEEESEDDSHLEGRDPDIWHVGFKISWDIETPGLAIPLHQ  
GDCYFMLDDLNATHQHCVLAGSQPRFSSTHRVAECSTGTLDYILQRCQLALQNVCDVDND  
DVSLKSFEPAVLKQGEEIHNEVEFEWLRQFWFQGNRYRKCTDWWCQPMAQLEALWKKMEG  
VTNAVLHEVKREGLPVEQRNEILTALASLTARQNLREWHARCQSRIARTLPADQKPECRPY  
WEKDDASMLPFDLTDIVSELRGQLLEAKP

<sup>EC</sup>**FTO-S246G**, <sup>BES</sup>**FTO:**

MGSSHHHHHHSSGLVPRGSHMKRTPTAEEREREAKKLRLLEELEDTWLPYLTPKDDEFYQQ  
WQLKYPKLILREASSVSEELHKEVQEAFLLHKGCLFRDLVRIQGKDLLTPVSRILIGNPGCT  
YKYLNTRLFTVPWPVKGSNIKHTAEIAAACETFLKLNDYLIQETIQALEELAAKEKANEDAV  
PLCMSADFPRVGMGSSYNGQDEVDIKSRAAYNVTLNFMDPQKMPYLKEEYPFGMGKMAV  
SWHHDENLVDRSAVAVYGYSCEGPEEESEDDSHLEGRDPDIWHVGFKISWDIETPGLAIPLHQ  
GDCYFMLDDLNATHQHCVLAGSQPRFSSTHRVAECSTGTLDYILQRCQLALQNVCDVDND  
DVSLKSFEPAVLKQGEEIHNEVEFEWLRQFWFQGNRYRKCTDWWCQPMAQLEALWKKMEG  
VTNAVLHEVKREGLPVEQRNEILTALASLTARQNLREWHARCQSRIARTLPADQKPECRPY  
WEKDDASMLPFDLTDIVSELRGQLLEAKP

<sup>EC</sup>**FTO-S256D:**

MGSSHHHHHHSSGLVPRGSHMKRTPTAEEREREAKKLRLLEELEDTWLPYLTPKDDEFYQQ  
WQLKYPKLILREASSVSEELHKEVQEAFLLHKGCLFRDLVRIQGKDLLTPVSRILIGNPGCT  
YKYLNTRLFTVPWPVKGSNIKHTAEIAAACETFLKLNDYLIQETIQALEELAAKEKANEDAV  
PLCMSADFPRVGMGSSYNGQDEVDIKSRAAYNVTLNFMDPQKMPYLKEEYPFGMGKMAV  
SWHHDENLVDRSAVAVYSYCEGPEEESEDDSHLEGRDPDIWHVGFKISWDIETPGLAIPLHQ  
GDCYFMLDDLNATHQHCVLAGSQPRFSSTHRVAECSTGTLDYILQRCQLALQNVCDVDND  
DVSLKSFEPAVLKQGEEIHNEVEFEWLRQFWFQGNRYRKCTDWWCQPMAQLEALWKKMEG  
VTNAVLHEVKREGLPVEQRNEILTALASLTARQNLREWHARCQSRIARTLPADQKPECRPY  
WEKDDASMLPFDLTDIVSELRGQLLEAKP
